# Supplementary material
Source: PubMed Central journal article supplement (PMC6613097)
Supplement: pnas.1821401116.sapp.pdf [file pnas.1821401116.sapp.pdf]

## Supporting Information

### SI Methods

#### Chemicals and reagents

Collagen type 2 (Cat. No. NC9693955) was purchased from Fisher Scientific (Pittsburgh, PA, USA). Dimethyl sulfoxide was from Sigma-Aldrich (Cat. No. D8418, Louis, MO, USA). 3-(3-pyridinyl)-1-(4-pyridinyl)-2-propen-1-one (3PO) was from Merck Millipore (Burlington, MA, USA). Sugen5416 (Cat. No. A3847) was from APEX BIO (Houston, TX, USA). Calcein-AM fluorescent dye was from Corning (Cat. No. 354216, New York, USA). Methanol was from Sigma-Aldrich (Cat. No. 179337, Louis, MO, USA). Hydrogen peroxide 30% (w/w) in water was from ACROS ORGANICS (Cat. No. AC41188, Radnor, PA, USA).

#### Generation of endothelial-specific *Pfkfb3* knockout mice

The animal use protocol was approved by the Institutional Animal Care & Use Committee of Augusta University. The *Pfkfb3*-floxed (*Pfkfb3*<sup>flox/flox</sup>, *Pfkfb3*<sup>WT</sup>) mice were generated by Xenogen Biosciences Corporation (Cranbury, NJ, USA) (1). Mice with *Pfkfb3* deficiency selective in endothelial cells (*Pfkfb3*<sup>ΔVEC</sup>) were generated by cross-breeding *Pfkfb3*<sup>flox/flox</sup> (*Pfkfb3*<sup>WT</sup>) mice with *Cdh5-Cre* transgenic mice (The Jackson Laboratory, Stk. No. 006137, Bar Harbor, ME, USA). Global heterozygous *Pfkfb3* (*Pfkfb3*<sup>+/-</sup>) knockout mice were generated as previously described (2). All mice were on a C57BL/6J background.

For the inducible endothelial-specific *Pfkfb3* knockout mice, *Pfkfb3* floxed mice were crossed with *Cdh5-CreER*<sup>T2</sup> mice (3) to generate *Cdh5-CreER*<sup>T2</sup>;*Pfkfb3*<sup>flox/flox</sup> mice (*Pfkfb3*<sup>ΔVEC-ERT2</sup>) and *Cdh5-CreER*<sup>T2</sup> mice (*Pfkfb3*<sup>WT-ERT2</sup>). The *Cdh5* promoter controls the activity of the tamoxifen-inducible Cre recombinase.

#### Hypoxic mouse PAH model

*Pfkfb3*<sup>ΔVEC</sup> and *Pfkfb3*<sup>WT</sup> mice were exposed to 10% oxygen or room air for four weeks. Anhydrous calcium sulfate and soda lime were used to keep the humidity and NH<sub>3</sub> within the chamber at normal levels. CO<sub>2</sub> concentration was controlled to less than 0.2% with *Litholyme*CO<sub>2</sub> absorbent (Allied Health Care Products, St. Louis, MO, USA). All of the experimental mice were fed the same chow diet and water. Four weeks later, mice were anesthetized, and the lung tissues collected for Western blot, quantitative real time PCR and histology analyses.

#### Rat Sugen5416/hypoxia pulmonary hypertension model

Male Sprague Dawley (SD) adult rats were purchased from Envigo RMS, Inc (Indianapolis, IN, USA). Rats were subcutaneously injected with 20 mg/kg of Sugen5416 (APEX BIO), which was dissolved in 0.5% carboxymethylcellulose, 0.9% NaCl, 0.4% polysorbate and 0.9% benzyl alcohol in deionized water. Rats were placed in normobaric hypoxia (10% oxygen) for three weeks. Rats were then removed from the hypoxia chamber and randomly divided into two groups for vehicle or 3PO treatment (50 mg/kg/day, dissolved in 10% Tween-80, 10% DMSO and 80% saline) for five weeks. Rats were anesthetized for echocardiographic and hemodynamic assay.

#### Echocardiography

Transthoracic echocardiography was performed with a Visual Sonics Vevo 2100 ultrasound machine with a 40 MHz ultrasound probe (MS-400) for mice and 25 MHz ultrasound probe (MS-250) for rats. Briefly, mice or rats were anesthetized with continuous isoflurane inhalation (1.5-3.0%) and placed on a

heated pad in a supine position. The fur on the chest of the mice or rats was removed with a chemical hair remover. The RV wall thickness during diastole was obtained from the parasternal long axis view using M-mode. The pulmonary artery (PA) acceleration time and ejection time were obtained from the modified parasternal long axis view using pulsed Doppler mode. The LV ejection fraction (LV EF), LV fractional shortening (LV FS) and the cardiac output (CO) were obtained from the parasternal short axis view using M-mode. The tricuspid annulus plain systolic excursion (TAPSE) was measured by M-mode from the parasternal short axis view at the aortic valve level.

### **Rat systolic arterial pressure measurement**

The rat tail cuff pressure was taken as an estimate of systolic arterial pressure as previously described (4, 5). Rats were trained for 4 consecutive days before the beginning of the experiments. In brief, rats were placed in a chamber and occluding cuffs and pneumatic pulse transducers were placed on the rats' tails. During the programmed electrophygmomanometer inflating and deflating, the signals were automatically obtained via a MacLab (ADInstruments, Milford, CT). A total of 12 readings were taken for each rat. The highest and lowest readings and any excess noise were removed, and the rest readings were averaged to determine the systolic arterial pressure.

### **Pulmonary hypertension and right ventricular hypertrophy assay**

After establishment of the PH model, mice were anesthetized with ketamine hydrochloride (60 mg/kg, *i.p.*) and the trachea was intubated. The diaphragm was surgically exposed through the abdomen. A 23 gauge needle connected to a pressure transducer (ADInstruments) was inserted into the right ventricle (RV) through the diaphragm, and right ventricular systolic pressure (RVSP) was continuously monitored for 10-15 minutes. The diaphragm remains intact without opening the chest. Rats were anesthetized with ketamine hydrochloride (80 mg/kg, *i.p.*) and a rigid cannula containing a flexible catheter (inside diameter, 0.58 mm; outside diameter, 0.965 mm) were inserted into the right ventricle via the right jugular vein for the RVSP measurement, and further the catheter was advanced into the main pulmonary arteries for the mPAP measurement through a pressure transducer (6). Data were recorded by the PowerLab data-acquisition system (ADI Instruments). After hemodynamic measurements, the heart and lungs of mice and rats were rinsed with PBS through the pulmonary artery and then were collected. The hearts were dissected, and the right ventricular hypertrophy were calculated as the ratio of the right ventricular free wall weight to the weight of the left ventricle plus septum (RV/LV+S). The changed percentage of RVSP or (RV/LV+S) of *Pfkfb3* deficient mice (KO) over that of control mice (WT) exposure to hypoxia was determined by  $[(\text{hypoxia/WT} - \text{normoxia/WT}) - (\text{hypoxia/KO} - \text{normoxia/KO})] / (\text{hypoxia/WT} - \text{normoxia/WT}) \times 100\%$ .

The left lungs were perfused with 4% paraformaldehyde (PFA) solution and embedded with paraffin or OCT for subsequent histological analysis. The right lungs were snap-frozen in liquid nitrogen for Western blot or quantitative real time PCR analyses.

### **Immunofluorescence staining**

After PBS perfusion, the left lobe of lungs was immersed in OCT followed by OCT embedding for cryosectioning. Lung sections (10  $\mu\text{m}$ ) were then fixed with 4% PFA solution for 10 minutes and permeabilized with 0.5% TritonX-100 for 10 minutes at room temperature followed by blocking with 10% normal goat serum for 1 h at room temperature. Lung sections were then incubated with anti- $\alpha$ -SMA antibody (1:200, Cat. No. 180106, Abcam, for mouse lung sections, and 1:500, Cat. No. ab5694, Abcam, for rat lung sections), anti-Ki67 antibody (1:50, Cat. No. RM9106, ThermoFisher Scientific, for mouse lung sections, and 1:50, Cat. No. AB9260, Millipore, for rat lung sections), anti-F4/80 antibody (1:200, Cat. No. ab6640, Abcam, for mouse lung sections), anti-CD68 antibody (1:100, Cat. No. ab955, Abcam,

for rat lung sections), and anti-HIF2A antibody (1:100, Cat. No. NB100-122, Novus Biologicals) overnight at 4°C. The next day, the slides were incubated with AlexaFluor conjugated isotype-specific secondary antibodies (1:250, Invitrogen) at room temperature for 1 h. Nuclei were counterstained with DAPI (1 µg/mL, Cat. No. D1306, ThermoFisher Scientific) for 5 minutes at room temperature. After washing with PBST three times, the samples were mounted with the mounting media (Cat. No. H-1000, Vector Laboratories, Burlingame, CA, USA).

For paraffin-embedded sections, the left lobe of lungs was perfused with 4% PFA followed by paraffin processing. Lung sections (5 µm) were dewaxed and dehydrated. Antigen retrieval was done by boiling the slides in 10 mmol/L sodium citrate (pH 6.0) at 98°C for 10 minutes. After cooling, the lung sections were blocked with 10% normal goat serum for 1 h at room temperature. Slides were then incubated with anti-PFKFB3 antibody (1:150, Cat. No. 13763-1-AP, ProteinTech), anti-CD31 antibody (1:200, Cat. No. DIA-310, for mouse lung sections, and 1:50, Cat. No. sc-374763, for rat lung sections), anti- $\alpha$ -SMA antibody (1:200, Cat. No. 180106, Abcam), anti-ICAM1 antibody (1:100, Cat. No. sc-8394, Santa Cruz), and anti-vWF antibody (1:300, Cat. No. A008229-5, Dako) overnight at 4°C. The next day, the slides were incubated with AlexaFluor conjugated isotype-specific secondary antibodies (1:250, Invitrogen) at room temperature for 1 h. Nuclei were counterstained with DAPI (1 µg/mL, ThermoFisher Scientific) for 5 minutes at room temperature. After washing three times with PBST, the samples were mounted with mounting media (Vector Laboratories).

### **Immunohistochemistry**

Rat paraffin-embedded lungs were sectioned and deparaffinized in xylene followed by rehydrating with gradient ethanol and water. The lung endogenous peroxidase activity was destroyed in methanol containing 30% H<sub>2</sub>O<sub>2</sub> for 30 min at room temperature. Antigen retrieval was performed with 10 mM sodium citrate buffer (pH 6.0) at 98°C for 10 min followed by blocking with avidin blocking solution for 1 hour at room temperature. Anti- $\alpha$ -SMA antibody (1:200, Cat. No. sc-56499, Santa Cruz) was diluted with biotin blocking solution according to manufacturer's instruction and incubated with slides at 4°C overnight. A biotinylated goat anti-mouse IgG (H+L) secondary antibody (1:200, Cat. No. BA-9200, Vector Laboratories) was incubated with lung sections for 1 hour at room temperature, followed by incubation with ABC solution (Cat. No. PK-6100, Vector Laboratories) for 30 min at room temperature. Then the antibody was detected with the peroxidase substrate 3,3'-diaminobenzidine (Cat. No. 3468, Dako, Santa Clara, CA, USA). The lung sections were counterstained with hematoxylin I (Cat. No. GHS116, Sigma). Then slides were dehydrated and mounted with xylene-based mounting medium (Cat. No. 8312-4, Richard-Allan Scientific).

### **Morphometric analysis**

Mouse or rat lung sections (5 µm in thickness) were immunostained with  $\alpha$ -SMA as described above. Images of distal pulmonary arterioles, 50-100 µm in diameter, were taken from three different areas per animal with a Carl Zeiss 780 upright confocal microscope (Carl Zeiss Germany). The medial wall thickness was calculated with ImageJ software. The entire vessel area was identified as the total area. The medial wall thickness ratio was calculated as (total area – lumen area) / total area.

### **Pulmonary vascular muscularization analysis**

Paraffin-embedded rat lung sections (5 µm in thickness) were labeled with  $\alpha$ -SMA as described above. To assess the degree of pulmonary arteriolar muscularization, arteries with a diameter at 25-75 µm with positive  $\alpha$ -SMA staining surrounding endothelial cells were identified and classified as fully muscularized (100~75%) and partially muscularized arteries (< 75%), whereas vessels with no significantly positive  $\alpha$ -SMA staining were classified as non-muscularized ones. A minimum of 20

vessels were counted from sections of each rat. Statistical significance was determined by comparing the percentage of muscularized vessels between groups.

### **Mouse or rat pulmonary endothelial cell isolation**

Lungs collected from euthanized mice or rats were minced, digested with 2 mg/mL of type 2 collagenase, and gently agitated for 40 minutes at 37°C. A 12-ml syringe was used to resuspend cells into a single-cell suspension, which was filtered through a 70- $\mu$ m cell strainer and centrifuged at 600 g for 5 min at 4°C. To exclude non-ECs, cell samples were re-suspended in 500  $\mu$ L of 0.1% bovine serum albumin, and incubated with 10 $\mu$ L of CD45 microbeads (Cat. No.130-052-301, Miltenyi Biotec, Bergisch Gladbach, Germany) for mouse cells and lung non-endothelial cell depletion cocktail (Cat. No.130-109-680, Miltenyi Biotec) for rat cells, respectively. After incubation for 15 min on ice, cell suspension were applied onto the LS columns (Cat. No.130-042-401, Miltenyi Biotec) and washed with 0.1% bovine serum albumin for three times. The effluents were collected and incubated with CD31 microbeads (Cat. No.130-097-418 for mouse cells, Cat. No.130-109-680 for rat cells, Miltenyi Biotec) for 15 min on ice. LS columns were used to collect the cells that were positively labeled by CD31 microbeads via magnetic separation according to the manufacturer's instructions.

### **Cell culture and treatments**

Human PAECs (HPAECs, Cat. No. CC-2530) were purchased from Lonza (NJ, USA) and were used at passages 3 to 8. HPAECs were cultured in Vessel Cell Basal Medium (VCBM, ATCC, Manassas, VA, USA) supplemented with Microvascular Endothelial Cell Growth Kit-BBE (ATCC, Manassas, VA, USA), and 1% penicillin/streptomycin (Cat. No. 15-140-122, Fisher Scientific). For the hypoxia experiments, the culture medium was changed to 25% VCBM (25% VCBM complete medium + 75% VCBM basal medium) and cells were placed in the modular incubator chamber (Fisher Scientific, Waltham, MA, USA) with 1% O<sub>2</sub>. The culture medium (conditioned media) was collected after 24 hours. Human PSMCs (HPASMCs) were purchased from Lonza (Cat. No. CC-2581) and used at passages 3 to 6. PSMCs were cultured in SBM-2 (Cat. No. CC-3181, Lonza) supplemented with SGM-2 (Cat. No. CC-4149, Lonza) and 1% penicillin/streptomycin. Before the proliferation assay, HPASMCs were starved for 16 hours with DMEM supplemented with 0.1% FBS, 10 mM L-glutamine, 100 IU/mL penicillin and 100  $\mu$ g/mL streptomycin, then replaced with the conditioned media and followed with incubation for 72 h for the WST-1 assay and 24 h for the EdU proliferation assay.

Mouse primary pulmonary artery smooth muscle cells (Ms PSMCs) were purchased from Cell Biologics (Cat. No.C57-6083, Chicago, IL, USA) and were used at passages 3 to 6. The culture medium and experimental treatment condition used for Ms PSMCs were the same as what have been used for human PSMCs.

Primary PAECs from peripheral type-III pulmonary arteries (<1 mm in diameter) of 4 IPAH patients (2 males and 2 females, 30-55 years of age) and 4 normal controls (2 males and 2 females, 26-54 years of age) were obtained from Pulmonary Hypertension Break-through Initiative (PHBI). The patients' identities were concealed. Exemptions of informed consents were approved by the Human Assurance Committee (HAC) of the Augusta University and by PHBI. These cells have been authenticated by PHBI to be endothelial cells using FACS analysis and immunofluorescence staining for von Willebrand factor. The cells were cultured and passaged in the same way as the Lonza PAECs. Third-to-five passage cells equilibrated in growth factor- and serum-free medium for 24 h were used for all experiments.

### **F-2,6-P2 level assay**

For F-2,6-P2 level normalization, mouse and rat lung samples were weighed, and cells were lysed. Protein content was determined by BCA assay. Using a previously described method (7), lung samples were homogenized in 5 - 100 volume of 0.05 M NaOH whereas PAEC suspensions were mixed with 1 volume of 0.1 M NaOH; the resulting mixture was heated for 5 min at 80 °C. After cooling, the samples were centrifuged and the obtained supernatants were neutralized with acetic acid. The mixture was again centrifuged and the levels of F-2,6-P2 in the supernatant were measured by the stimulation of PPi-PFK assayed in the presence of 0.5 mM pyrophosphate and 1 mM fructose 6-phosphate in the assay mixture as shown in the table below. Measurement was conducted at 340nm with Synergy H1 Hybrid Reader (BioTek, Gene Company). The OD values of F-2,6-P2 in these groups were calculated and normalized to protein content.

**Supplemental Table 1. Reaction system for F-2,6-P2 level assay.**

| Substrate         | Initial concentration | Final concentration                    |
|-------------------|-----------------------|----------------------------------------|
| Tris-HCl (pH7.5)  | 50 mM                 | Make up the rest volume of 150 $\mu$ L |
| NADH              | 20 mM                 | 0.2 mM                                 |
| DTT               | 1 M                   | 5 mM                                   |
| F6P               | 200 mM                | 1 mM                                   |
| MgCl <sub>2</sub> | 1 M                   | 2 mM                                   |
| Aldolase          | 700 U/mL              | 0.7 U/mL                               |
| GDH               | 450 U/mL              | 0.45 U/mL                              |
| TIM               | 1200 U/mL             | 0.6 U/mL                               |
| PPi-PFK           |                       |                                        |
| PPi-Na            | 25 mM                 | 0.5 mM                                 |

Note : PPi-PFK was extracted from sprouted potatoes and dissolved with 100 mM of Tris-HCl (pH8.4). The PPi-PFK solution was centrifuged at 14,000 rpm for 20 min at 4 °C and 10  $\mu$ g PPi-PFK was used for each reaction

### Lactate assay

The lactate levels in the PAECs were measured with the Lactate Assay Kit (Cat. No. MAK064, Sigma) according to the manufacturer's instructions.

### Pyruvate assay

The pyruvate levels in the PAECs were measured with the Pyruvate Assay Kit (Cat. No. MAK071, Sigma) according to the manufacturer's instructions.

### Adenovirus transduction of PAECs

HPAECs grown to 80% confluence were incubated with 500  $\mu$ L basal medium containing adenoviral vectors of PFKFB3 knockdown (Ad-sh*PFKFB3*) or overexpression (Ad-*PFKFB3*) and their negative control adenovirus (Ad-sh*CTRL* or Ad-*CTRL*) for 2 hours. The medium was then replaced with fresh complete growth medium for continuous culture. After 48 hours, the cells were treated as indicated and collected for Western-blot and quantitative RT-PCR (qRT-PCR) analyses.

### RNA interference

When HPAECs reached 70% confluence, they were transfected with 25 nM of siRNAs targeting human *PFKFB3* (si*PFKFB3*, Cat. No. L-006763-00-0005; Dharmacon, Lafayette, CO, USA) or *HIF1A* (si*HIF1A*, Cat. No. L-004018-00-0005; Dharmacon, Lafayette, CO, USA) or *HIF2A* (si*HIF2A*, Cat. No.

L-004814-00-0005; Dharmacon, Lafayette, CO, USA) or with a non-targeting negative control (siCTRL, Cat. No. D-001810-10-05; Dharmacon) using Lipofectamine RNAiMax reagent (Cat. No 13778-150; Invitrogen) according to the manufacturer's protocol. Four hours later, the medium was changed to complete growth medium for continuous culture. The cells underwent different treatments within 48 hours after siRNA transduction and were then collected for various assays.

### **Metabolic measurements**

Human and isolated rat PAECs were seeded in the Seahorse XF96 cell culture plates at a density of  $1.5 \times 10^4$  per well (Seahorse Bioscience, North Billerica, MA) in complete endothelial culture medium (VCBM). The medium was changed the next day to XF base assay medium (Seahorse Bioscience) supplemented with 2 mM glutamine with pH adjusted to 7.4. The plate was placed in a non-CO<sub>2</sub> incubator at 37°C for 1 hour. The assay was run on the XF96 extracellular flux analyzer (Seahorse Bioscience).

### **Western blot analysis**

Protein extracts were prepared from lung tissues and cells by lysing tissues and cells in RIPA buffer containing protease inhibitor cocktails (Cat. No. 05892970001, Roche, SC, USA). The lung tissues were grinded and tissue lysis was prepared. Extracts were centrifuged at 12000 rpm for 10 minutes. The supernatant was removed and the protein concentration was determined by BCA assay. The samples were separated by SDS-PAGE followed by transfer onto nitrocellulose membranes. After blocking in 5% skim milk for one hour, blots were probed using the below primary antibodies: PFKFB3 (1:1000, Cat. No. ab181861, abcam), PCNA (1:1000, Cat. No. sc-56, Santa Cruz), ICAM-1 (1:1000, cat. No. sc-8314, Santa Cruz), VCAM-1 (1:1000, Cat. No. sc-1504, Santa Cruz), HIF1A (1:1000, cat. No. AF1935-SP, R&D systems), HIF2A (1:1000, Cat. No. NB100-122, Novus). Anti-β-actin (1:1000, Cat. No. sc47776, Santa Cruz) and GAPDH (1:1000, Cat. No. 2118, CST) were used as loading controls.

### **RNA extraction and quantitative RT-PCR (qRT-PCR) analysis**

Total RNA was extracted from cells and frozen mouse lung tissues with Trizol Reagent (Cat. No. 15596018, Invitrogen, Grand Island, NY). 1 µg of RNA was used for cDNA synthesis with the cDNA synthesis kit (Cat. No. 170-8891, BioRad) according to the manufacturer's instructions. qRT-PCR was performed with universal SYBR green mix (Cat. No. 172-5122, BioRad) on the StepOne Plus System (Applied Biosystems, Grand Island, NY). The sequences of gene-specific primers are provided in Supplementary Table 2.  $2^{-\Delta\Delta CT}$  method was used to quantify the relative expression of target genes. 18S rRNA (for human and mouse genes) or cyclophilin A (CypA, for rat genes) were used as the internal controls.

### **ELISA assay**

The levels of growth factors (PDGF-BB, FGF2 and TGFβ1) and cytokines (CXCL12, IL1β and TNFα) released in the culture supernatants of human and mouse PAECs were measured with R&D Quantikine ELISA kits (R&D Systems, Minneapolis, USA) according to the manufacturer's instructions.

### **Monocyte adhesion assay**

THP-1 cells were used in this study. The THP-1 cells were firstly labeled with Calcein-AM (Thermo Fisher Scientific) according to the manufacturer's instructions. Then the confluent monolayer of PAECs were incubated with THP-1 cells for 20 min at 37°C. After incubation, PAECs were washed with RPMI-1640 three times followed by fixing with 4% PFA. Then images were taken under the fluorescence

microscope. Fluorescent-positive cells were counted with ImageJ software and normalized with total cell numbers.

### PASMC proliferation assay

For EdU staining assay, human PASMCs were seeded in 4-well culture slides (Corning) at a density of  $5 \times 10^4$  in a volume of 1 mL of smGM-2 complete medium. When the cell confluence reached 80%, human PASMCs were starved with DMEM supplemented with 0.1% FBS, 10 mM L-glutamine, 100 IU/mL penicillin and 100 µg/mL streptomycin for 16 h followed by addition of the previously collected conditioned medium and 10 µM of EdU solution for 24 hours. The Click-iT EdU imaging kit (Cat. No. C10337, Invitrogen) was then used according to the manufacturer's instructions.

For WST-1 proliferation assay, human PASMCs were seeded in 96-well plates at a density of  $2 \times 10^4$  in a volume of 100 µL of smGM-2 complete medium. When the cell confluence reached 80%, the human PASMCs were starved with DMEM supplemented with 0.1% FBS, 10 mM L-glutamine, 100 IU/mL penicillin and 100 µg/mL streptomycin for 16 hours and then replaced with the previously collected conditioned medium. 72 hours later, 10 µL of WST-1 reagent was added per well and the plate incubated at 37°C and 5% CO<sub>2</sub> for 3 hours. Absorbance was then read at OD450.

### Statistical analysis

Statistical analysis was performed with GraphPad Prism software (LaJolla, CA, USA). The significance of the differences between two groups was assessed using unpaired Student's *t* test for  $n > 5$ , and Mann-Whitney *U* test for  $n < 5$ . Multiple comparisons were performed by one-way ANOVA followed by Bonferroni's *post hoc* test. All results are presented as mean  $\pm$  SEM.  $P < 0.05$  was considered significant (\*  $p < 0.05$ , \*\*  $p < 0.01$ , \*\*\*  $p < 0.001$ ). All biological experiments were repeated at least three times using independent cell cultures or individual animals (biological replications).

### Supplemental Table 2. Primer sequences used for QRT-PCR analyses.

| Gene name           | Forward primer            | Reverse primer               |
|---------------------|---------------------------|------------------------------|
| (H/Ms/Rat)18s rRNA  | CTTAGAGGGACAAGTGGCG       | ACGCTGAGCCAGTCAGTGTA         |
| Human <i>PFKFB3</i> | CTCGCATCAACAGCTTTGAGG     | TCAGTGTTTCCTGGAGGAGTC        |
| Human <i>PDGFB</i>  | GCACACGCATGACAAGACGGC     | AGGCAGGCTATGCTGAGAGGTC<br>C  |
| Human <i>FGF2</i>   | ACGGCGTCCGGGAGAA          | ACACTCCCTTGATGGACACAAC<br>T  |
| Human <i>TGFB1</i>  | TCCTGCTTCTCATGGCCA        | CCTCAGCTGCACTTGTAG           |
| Human <i>CXCL12</i> | AACTGTGCCCTTCAGATTGTAG    | TCGAGTGGGTCTAGCGGAAAGT       |
| Human <i>IL1B</i>   | TTGTTGAGCCAGGCCTCTCT      | ACCAAATGTGGCCGTGGTT          |
| Human <i>ICAM-1</i> | GGCCGGCCAGCTTATACAC       | TAGACACTTGAGCTCGGGCA         |
| Human <i>VCAM-1</i> | TCAGATTGGAGACTCAGTCATGT   | ACTCCTCACCTTCCCGCTC          |
| Human <i>TNFA</i>   | CCCCAGGGACCTCTCTCTAATC    | GGTTTGCTACAACATGGGCTAC<br>A  |
| Mouse <i>Pfkfb3</i> | GATCTGGGTGCCCCGTCGATCACCG | CAGTTGAGGTAGCGAGTCAGCT<br>TC |
| Mouse <i>Pdgfb</i>  | ATCCGCTCCTTTGATGATCT      | GAGCTTTCCAACCTCGACTCC        |
| Mouse <i>Fgf2</i>   | CAACCGGTACCTTGCTATGA      | TCCGTGACCGGTAAGTATTG         |

|                                     |                             |                                  |
|-------------------------------------|-----------------------------|----------------------------------|
| Mouse <i>Tgfb1</i>                  | CCCTATATTTGGAGCCTGGA        | CTTGCGACCCACGTAGTAGA             |
| Mouse <i>Cxcl12</i>                 | CCAAGAGTACCTGGAGAAAGC       | AGTTACAAAGCGCCAGAGCA             |
| Mouse <i>Il1b</i>                   | TGTCTTGGCCGAGGACTAAGG       | TGGGCTGGACTGTTTCTAATGC           |
| Mouse <i>Icam-1</i>                 | GTGGCGGGAAAGTTCCTG          | CGTCTTGCAGGTCATCTTAGGA<br>G      |
| Mouse <i>Vcam-1</i>                 | AGTTGGGGATTTCGGTTGTTC       | CATTCCTTACCACCCCATTG             |
| Mouse <i>TNF<math>\alpha</math></i> | AGGGTCTGGGCCATAGAAGT        | CCACCACGCTCTTCTGTCTAC            |
| Mouse $\beta$ -actin                | TGT CCA CCT TCC AGC AGA TGT | AGC TCA GTA ACA GTC CGC<br>CTA G |
| Mouse <i>Rps3</i>                   | GCTGAAGATGGCTACTCTGGAG      | CTGGACAAGTGCAGGTCAGTCT           |
| Mouse <i>Arg1</i>                   | GGAATCTGCATGGGCAACCTGTGT    | AGGGTCTACGTCTCGCAAGCCA           |
| Mouse <i>Mt1</i>                    | AAGAGTGAGTTGGGACACCTT       | GAGACAATACAATGGCCTCC             |
| Mouse <i>Slc39a12</i>               | ACCATCCAAGTGAAGGCCC         | TGTGCAGGCTATCTCCAACC             |
| Mouse <i>Egln3</i>                  | CAACTTCCTCCTGTCCCTCATC      | CCTGGATAGCAAGCCACCATTG           |
| Mouse <i>Serpine</i>                | AGTCTTTCCGACCAAGAGCAG       | GATGACAAAGGCTGTGGAGGA            |
| Mouse <i>Pak6</i>                   | TCCGAAGCATGTTCTGTCCAC       | GCTACCAGGTTTGAAGAGGAGT<br>C      |
| Mouse <i>Il6</i>                    | TCTTGGGACTGATGCTG GTGA      | GCAAGTGCATCATCGTT GTTCA          |
| Mouse <i>Lox</i>                    | CATCGGACTTCTTACCAAGCCG      | GGCATCAAGCAGGTCATAGTGG           |
| Mouse <i>Bnip3</i>                  | GCTCCCAGACACCACAAGAT        | TGAGAGTAGCTGTGCGCTTC             |
| Mouse <i>Angptl4</i>                | CTGGACAGTGATTGAGAGACGC      | GATGCTGTGCATCTTTTCCAGGC          |
| Mouse <i>Eno1</i>                   | TGCGTCCACTGGCATCTAC         | CAGAGCAGGCGCAATAGTTTAA           |
| Mouse <i>Nov</i>                    | GTCACCAACAGGAATCGCCAGT      | GTAGGTGGATGGCTTTCAGGGA           |
| Mouse <i>Pgk1</i>                   | GATGCTTTCCGAGCCTCACTGT      | ACCAGCCTTCTGTGGCAGATTC           |
| Mouse <i>Edn</i>                    | TTCCCAATAAGGCCACAGACC       | TTGGGCCCTGAGTTCTTTTCC            |
| Mouse <i>NOS2</i>                   | GTTCTCAGCCCAACAATACAAGA     | GTGGACGGGTCGATGTCAC              |
| Rat <i>CypA</i>                     | TATCTGCACTGCCAAGACTGAGTG    | CTTCTTGCTGGTCTTGCCATTCC          |
| Rat <i>Pfkfb3</i>                   | CACGGCGAGAATGAGTACAA        | TTCAGCTGACTGGTCCACAC             |
| Rat <i>Pdgfb</i>                    | ACACCTCAAACCTCGGGTGAC       | TCAGTGCCTTCTTGTCATGG             |
| Rat <i>Fgf2</i>                     | ACGGCGTCCGGGAGAA            | ACACTCCCTTGATGGACACAAC<br>T      |
| Rat <i>Tgfb1</i>                    | ATACGCCTGAGTGGCTGTCT        | TGAAGCGAAAGCCCTGTATT             |
| Rat <i>Cxcl12</i>                   | TGTGCATTGACCCGAAATTA        | TCCTCAGGGGTCTACTGGAA             |
| Rat <i>Il1b</i>                     | CACCTCTCAAGCAGAGCACAG       | GGGTTCATGGTGAAGTCAAC             |
| Rat <i>TNF<math>\alpha</math></i>   | AAATGGGCTCCCTCTCATCAGTTC    | TCTGCTTGGTGGTTTGCTACGAC          |
| Rat <i>Icam-1</i>                   | CTTCCGACTAGGGTCCTGAA        | CTTCAGAGGCAGGAAACAGG             |
| Rat <i>Vcam-1</i>                   | TGCACGGTCCCTAATGTGTA        | TGCCAATTCCTCCCTTAAA              |

**Supplemental Table 3. List of antibodies used for Western blots**

| Primary antibodies | Company    | Species | Type       | Dilution (final concentration) | Cat. No  |
|--------------------|------------|---------|------------|--------------------------------|----------|
| PFKFB3             | Abcam      | Rabbit  | Monoclonal | 1/1000                         | ab181861 |
| PCNA               | Santa Cruz | Mouse   | Monoclonal | 1/1000                         | sc-56    |
| $\beta$ -actin     | Santa Cruz | Mouse   | Monoclonal | 1/2000                         | sc-47778 |
| ICAM-1             | Santa Cruz | Mouse   | Monoclonal | 1/1000                         | sc-8439  |
| VCAM-1             | Santa Cruz | Goat    | Polyclonal | 1/1000                         | sc-1504  |

|       |             |        |            |        |           |
|-------|-------------|--------|------------|--------|-----------|
| HIF2A | Novus       | Rabbit | Polyclonal | 1/1000 | NB100-122 |
| HIF1A | R&D systems | Goat   | Polyclonal | 1/500  | AF1935-SP |
| GAPDH | CST         | Rabbit | Monoclonal | 1/1000 | 2118      |

**Supplemental Table 4. List of antibodies used for immunofluorescent assay**

| Primary antibodies                                         | Company     | Species | Type       | Dilution | Cat. No    |
|------------------------------------------------------------|-------------|---------|------------|----------|------------|
| PFKFB3                                                     | ProteinTech | Rabbit  | Polyclonal | 1/200    | 13763-1-AP |
| CD31                                                       | Dianova     | Rat     | Monoclonal | 1/200    | DIA-310    |
| PECAM-1                                                    | Santa Cruz  | Mouse   | Monoclonal | 1/50     | sc-376764  |
| $\alpha$ -SMA                                              | Sigma       | Mouse   | Monoclonal | 1/200    | C6198      |
| $\alpha$ -SMA                                              | Abcam       | Rabbit  | Polyclonal | 1/500    | Ab5694     |
| F4/80                                                      | Abcam       | Rat     | Monoclonal | 1/200    | Ab6640     |
| CD68                                                       | Abcam       | Mouse   | Monoclonal | 1/100    | Ab955      |
| ICAM-1                                                     | Santa Cruz  | Mouse   | Monoclonal | 1/100    | sc-8439    |
| vWF                                                        | Dako        | Rabbit  | Polyclonal | 1/300    | A008229-5  |
| Secondary antibodies (Invitrogen Corp., Carlsbad, CA, USA) |             | Species | Type       | Dilution | Cat. No    |
| Alexa 488-conjugated anti-mouse IgG                        |             | Mouse   | polyclonal | 1/250    | A11001     |
| Alexa 488-conjugated anti-rabbit IgG                       |             | Rabbit  | polyclonal | 1/250    | A11008     |
| Alexa 488-conjugated anti-rat IgG                          |             | Rat     | polyclonal | 1/250    | A11006     |
| Alexa 594-conjugated anti-mouse IgG                        |             | Mouse   | polyclonal | 1/250    | A11032     |
| Alexa 594-conjugated anti-rabbit IgG                       |             | Rabbit  | polyclonal | 1/250    | A11012     |
| Alexa 594-conjugated anti-rat IgG                          |             | Rat     | polyclonal | 1/250    | A21471     |

**Supplemental Table 5. List of siRNAs used**

|       | Target gene   | Species | Company   | Catalog number          |
|-------|---------------|---------|-----------|-------------------------|
| siRNA | PFKFB3        | Human   | Dharmacon | L-006763-00-0005 5 nmol |
| siRNA | HIF1A         | Human   | Dharmacon | L-004018-00-0005 5 nmol |
| siRNA | HIF2A         | Human   | Dharmacon | L-004814-00-0005 5 nmol |
| siRNA | Non-targeting | Human   | Dharmacon | D-001810-10-05          |

**Supplemental Table 6. List of ELISA kits used**

| ELISA Kit name | Cat. No. | Vendor |
|----------------|----------|--------|
|----------------|----------|--------|

|                                           |        |             |
|-------------------------------------------|--------|-------------|
| Human PDGF-BB Quantikine ELISA kit        | DBB00  | R&D Systems |
| Human FGF basic Quantikine ELISA kit      | DFB50  | R&D Systems |
| Human TGF- $\beta$ 1 Quantikine ELISA kit | DB100B | R&D Systems |
| Human CXCL12 Quantikine ELISA kit         | DSA00  | R&D Systems |
| Human IL-1 $\beta$ Quantikine ELISA kit   | DLB50  | R&D Systems |
| Human TNF- $\alpha$ QuantiGlo ELISA kit   | QTA00B | R&D Systems |
| Mouse PDGF-BB Quantikine ELISA kit        | MBB00  | R&D Systems |
| Mouse FGF basic Quantikine ELISA kit      | MFB00  | R&D Systems |
| Mouse TGF- $\beta$ 1 Quantikine ELISA kit | MB100B | R&D Systems |
| Mouse CXCL12 Quantikine ELISA kit         | MCX120 | R&D Systems |
| Mouse IL-1 $\beta$ Quantikine ELISA kit   | MLB00C | R&D Systems |
| Mouse TNF- $\alpha$ Quantikine ELISA kit  | MTA00B | R&D Systems |

## References

1. Xu Y, *et al.* (2014) Endothelial PFKFB3 plays a critical role in angiogenesis. *Arterioscler Thromb Vasc Biol* 34(6):1231-1239.
2. Chesney J, *et al.* (2005) Targeted disruption of inducible 6-phosphofructo-2-kinase results in embryonic lethality. *Biochem Biophys Res Commun* 331(1):139-146.
3. Benedito R, *et al.* (2009) The notch ligands Dll4 and Jagged1 have opposing effects on angiogenesis. *Cell* 137(6):1124-1135.
4. Pollock DM & Rekito A (1998) Hypertensive response to chronic NO synthase inhibition is different in Sprague-Dawley rats from two suppliers. *The American journal of physiology* 275(5):R1719-1723.
5. Pollock DM, Polakowski JS, Divish BJ, & Opgenorth TJ (1993) Angiotensin blockade reverses hypertension during long-term nitric oxide synthase inhibition. *Hypertension (Dallas, Tex. : 1979)* 21(5):660-666.
6. van der Feen DE, *et al.* (2017) Shunt Surgery, Right Heart Catheterization, and Vascular Morphometry in a Rat Model for Flow-induced Pulmonary Arterial Hypertension. *Journal of visualized experiments : JoVE* (120).
7. Van Schaftingen E, Lederer B, Bartrons R, & Hers HG (1982) A kinetic study of pyrophosphate: fructose-6-phosphate phosphotransferase from potato tubers. Application to a microassay of fructose 2,6-bisphosphate. *European journal of biochemistry* 129(1):191-195.

## Supplementary figures and figure legends

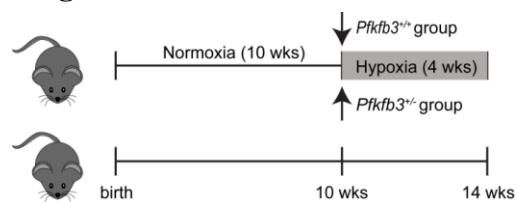

**Figure S1. Experimental design for hypoxia-induced mouse PH.** 10 weeks after birth, *Pfkfb3*<sup>+/+</sup> and control mice (*Pfkfb3*<sup>-/-</sup>) were exposed to normoxia or hypoxia (10% O<sub>2</sub>) for 4 weeks. Mice were anesthetized and analyzed for hemodynamic changes and other parameters.

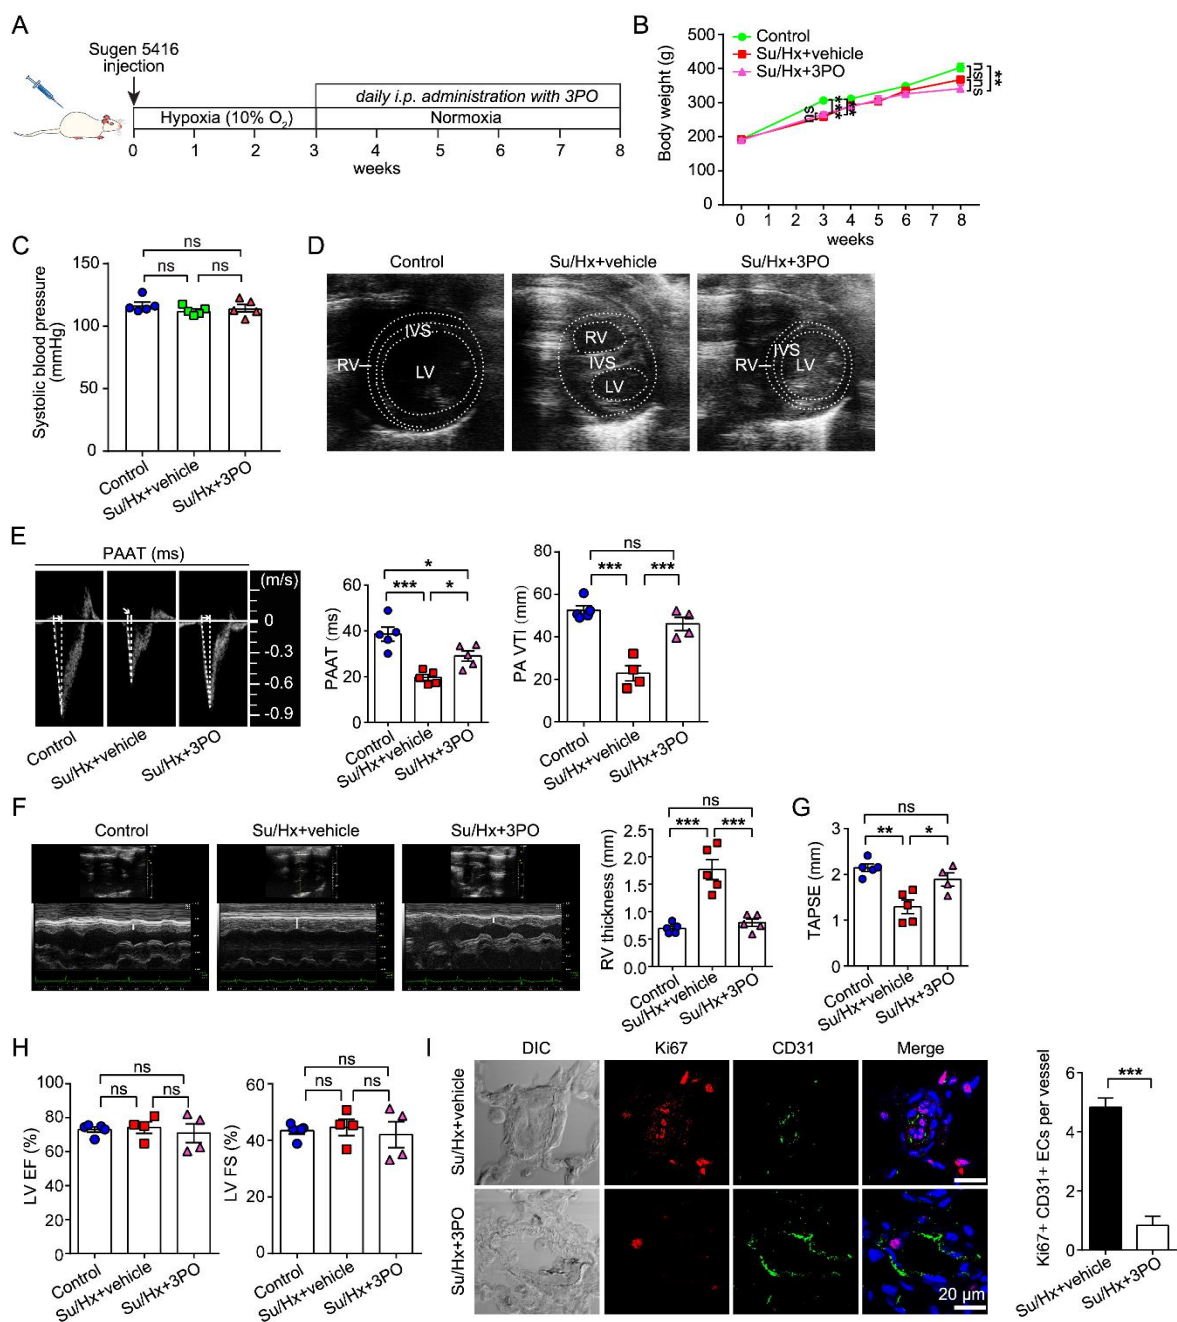

**Figure S2. Treatment with 3PO improved hemodynamics in rats with Su/Hx-induced PH. (A)**

Experimental design for treatment of Su/Hx-treated rats with 3PO. (B) Rat body weight change during the whole experimental course.  $n = 9-10$ . (C) Systolic blood pressure of control rats and 3PO-treated or vehicle-treated Su/Hx rats.  $n = 5$ . (D) Representative echocardiograms show the relative normal RV chamber in 3PO-treated rats with PH compared with the enlarged RV chamber in rats with PH. (E) Representative echocardiographic images of pulsed wave Doppler of pulmonary artery flow and quantification of the pulmonary acceleration time (PAAT, ms) and PA VTI. (F) Representative echocardiograms and quantification results show the reduced RV wall thickness in 3PO-treated rats with PH compared with that of vehicle-treated rats with PH. (G) quantification of tricuspid annular plane systolic excursion (TAPSE, mm). (H) LV EF % and LV FS % analysis of 3PO-treated or vehicle-treated rats determined by echocardiography. (I) (*left*) Representative micrographs of proliferating endothelial cells in pulmonary vascular lesions of rat lung sections, and (*right*) quantification of Ki67 and CD31 positive endothelial cells (ECs) per vessel. The sections were co-stained with Ki67 (red), CD31 (green) and DAPI (blue). Scale bar, 20  $\mu\text{m}$ . All data are expressed as mean  $\pm$  SEM. Statistical significance was determined by one-way ANOVA followed by Bonferroni test (for B-C and E-H) and unpaired Student's  $t$  test (for I). \*  $p < 0.05$  was considered significant, \*\*  $p < 0.01$ , \*\*\*  $p < 0.001$ . ns, no significance.

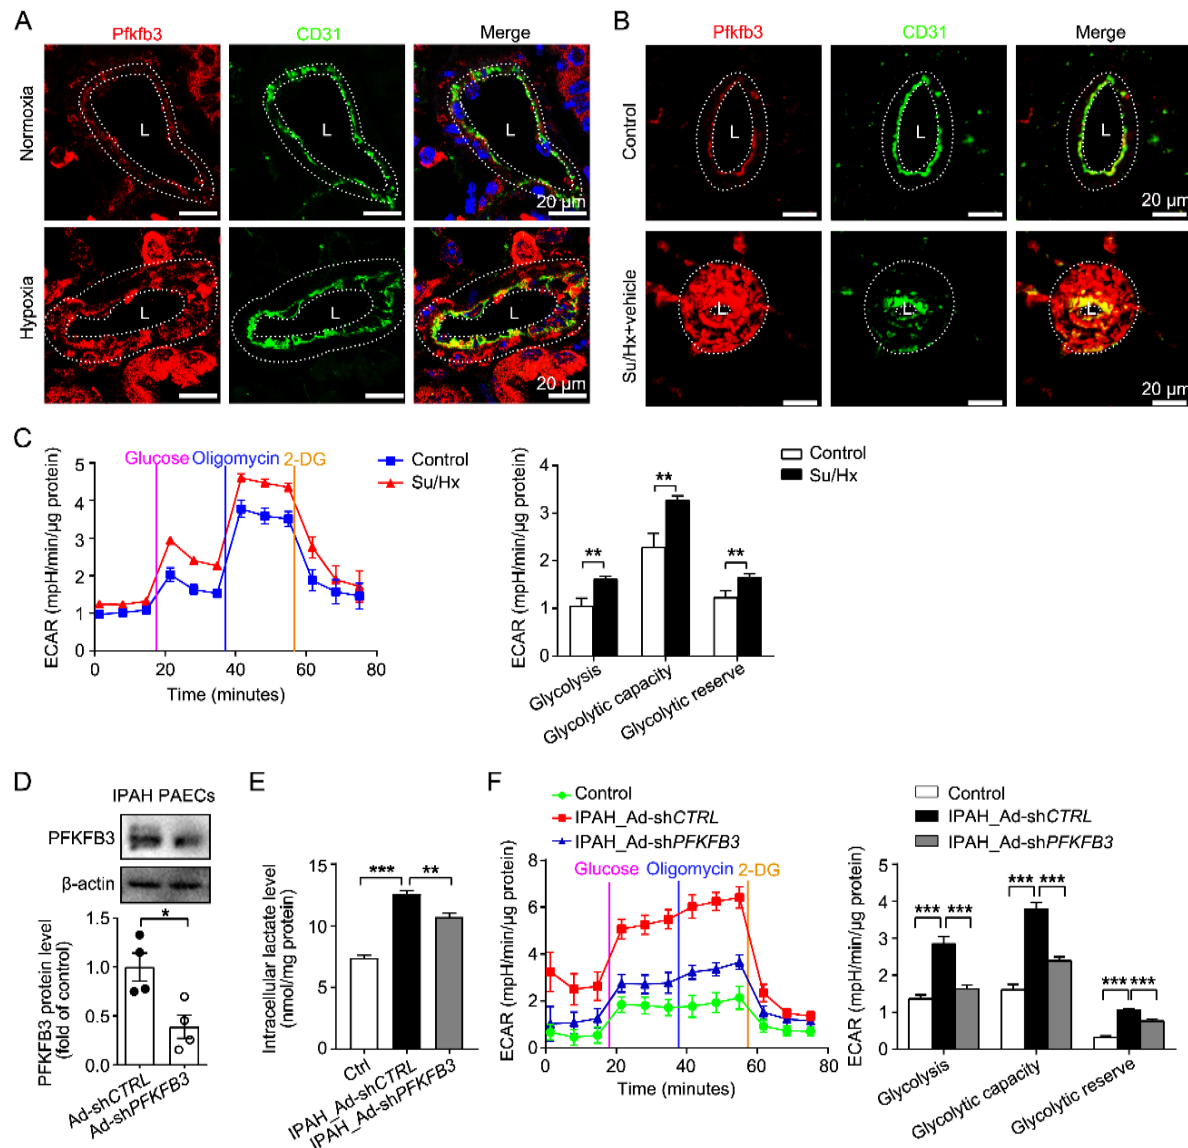

**Figure S3. Pfkfb3 expression level is significantly increased in pulmonary endothelium of mice and rats with PH.** (A) Representative micrographs of Pfkfb3 expression in the pulmonary endothelium of control (normoxia) or PH (hypoxia) mice. Sections were co-stained for Pfkfb3 (red) and CD31 (green). L, lumen. Scale bar, 20 μm. (B) Representative micrographs of Pfkfb3 expression in the pulmonary endothelium of control or Su/Hx PH rats. Sections were co-stained for Pfkfb3 (red) and CD31 (green). L, lumen. Scale bar, 20 μm. (C) (left) ECAR profile showing glycolytic activity in PAECs of control and Su/Hx rats. Vertical lines represent the time of addition of glucose (10 mmol/L), oligomycin (1 μmol/L), and 2-DG (50 mmol/L). (right) Quantification of glycolytic function parameters. (D) Western blot analysis and densitometric quantification of PFKFB3 protein levels in IPAH patient PAECs transfected with Ad-shCTRL or AdshPFKFB3. n = 4. (E) Intracellular lactate levels from Ad-shCTRL and Ad-shPFKFB3-transfected PAECs of control subjects or patients with IPAH. (F) (left) ECAR profile showing glycolytic activity in Ad-shCTRL and Ad-shPFKFB3-transfected PAECs of control subjects or patients with IPAH. Vertical lines represent the time of addition of glucose (10 mmol/L), oligomycin (1 μmol/L), and 2-DG (50 mmol/L). (right) Quantification of glycolytic function parameters. All data are expressed as mean ± SEM. Statistical significance was determined by unpaired Student's *t* test (for C), Mann-Whitney *U* test (for D) and one-way ANOVA followed by Bonferroni test (for E and F). \* *p* < 0.05 was considered significant, \*\* *p* < 0.01, \*\*\* *p* < 0.001.

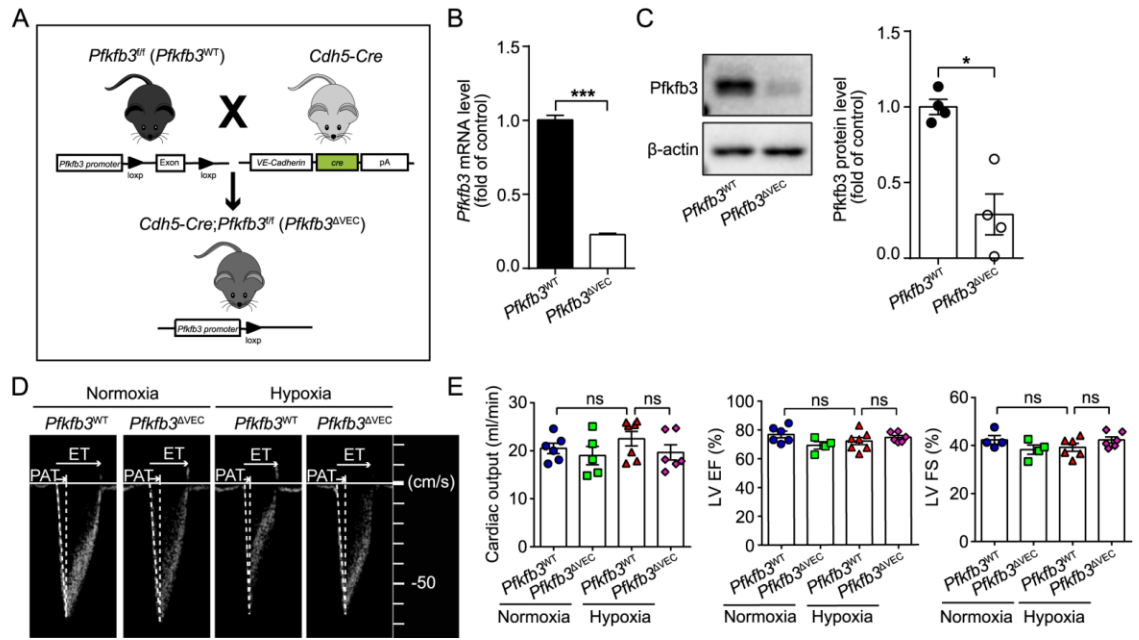

**Figure S4. Endothelial specific *Pfkfb3* deficiency in mice ameliorates the development of hypoxia-induced PH.** (A) Strategy for generating *Pfkfb3*<sup>ΔVEC</sup> mice by crossing *Pfkfb3*<sup>fl/fl</sup> mice with *Cdh5-Cre* mice. (B) Real time-PCR analysis of mRNA levels of *Pfkfb3* in PAECs isolated from *Pfkfb3*<sup>WT</sup> and *Pfkfb3*<sup>ΔVEC</sup> mice. n = 6. (C) Western blot analysis and densitometric quantification of Pfkfb3 protein level in PAECs of *Pfkfb3*<sup>WT</sup> and *Pfkfb3*<sup>ΔVEC</sup> mice. n = 4. (D) Representative echocardiographic images of pulsed wave Doppler of pulmonary artery flow. (E) Echocardiography analysis of cardiac output, LV EF % and LV FS % of *Pfkfb3*<sup>WT</sup> and *Pfkfb3*<sup>ΔVEC</sup> mice exposed to normoxia or hypoxia (10% O<sub>2</sub>) for 4 weeks. n = 4-7. All data are expressed as mean ± SEM. Statistical significance was determined by unpaired Student's *t* test (for B), Mann-Whitney *U* test (for C) and one-way ANOVA followed by Bonferroni test (for E). \* *p* < 0.05 was considered significant, \*\* *p* < 0.01, \*\*\* *p* < 0.001. ns, no significance.

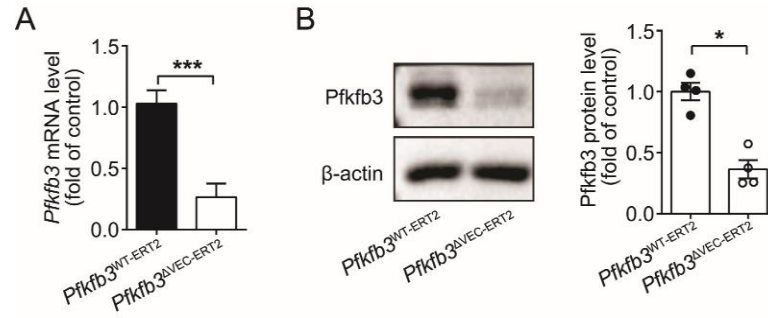

**Figure S5. Endothelial *Pfkfb3* was successfully deleted in *Pfkfb3*<sup>ΔVEC-ERT2</sup> mice after tamoxifen administration.** (A) Real time-PCR analysis of mRNA levels of *Pfkfb3* in PAECs isolated from *Pfkfb3*<sup>WT-ERT2</sup> and *Pfkfb3*<sup>ΔVEC-ERT2</sup> mice. n = 6. (B) Western blot analysis and densitometric quantification of Pfkfb3 protein level in PAECs of *Pfkfb3*<sup>WT-ERT2</sup> and *Pfkfb3*<sup>ΔVEC-ERT2</sup> mice. n = 4. All data are expressed as mean ± SEM. Statistical significance was determined by unpaired Student's *t* test (for A) and Mann-Whitney *U* test (for B). \* *p* < 0.05 was considered significant, \*\* *p* < 0.01, \*\*\* *p* < 0.001.

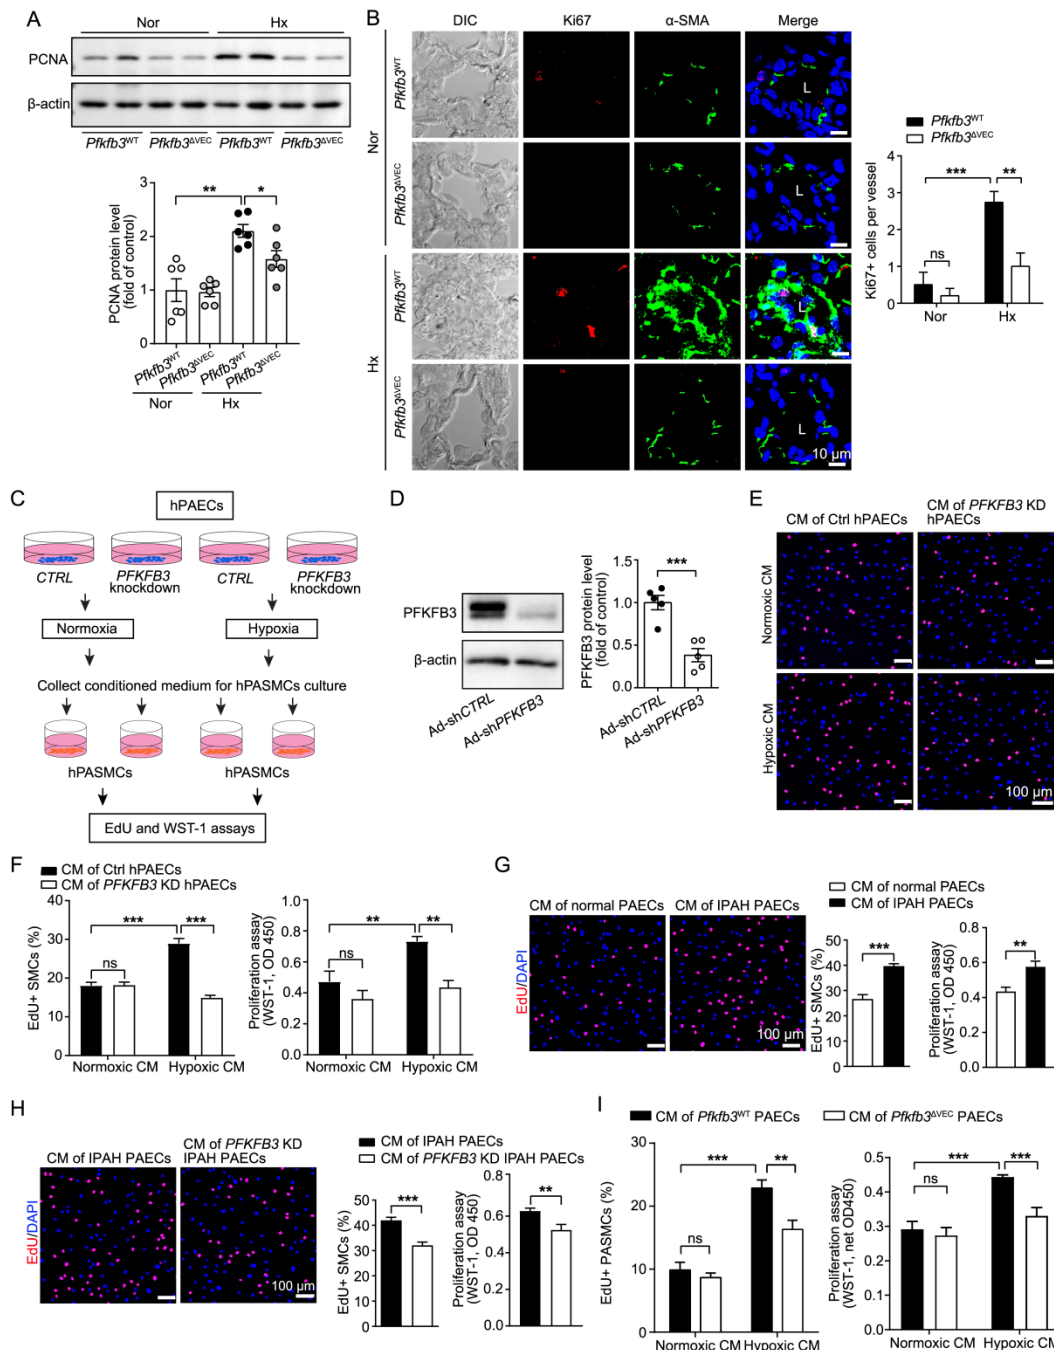

**Figure S6. PFKFB3/*Pfkfb3* knockdown or deficiency in PAECs affect proliferation of PSMCs *in vitro*.** (A) Western-blot analysis and densitometric quantification of PCNA protein levels of lung homogenates from *Pfkfb3*<sup>WT</sup> and *Pfkfb3* <sup>$\Delta$ VEC</sup> mice exposed to normoxia or hypoxia (10% O<sub>2</sub>) for 4 weeks. n = 6. (B) (left) Representative images for Ki67 immunostaining of the distal pulmonary arteries of *Pfkfb3*<sup>WT</sup> and *Pfkfb3* <sup>$\Delta$ VEC</sup> mice under normoxic or hypoxic conditions for 4 weeks, and (right) quantification of Ki67 positive cells per vessel. Lung sections were costained with Ki67 (red),  $\alpha$ -SMA (green) and DAPI (blue). L, lumen. Scale bar, 10  $\mu$ m. n = 5-9. (C) Experimental design for analysis of human or mouse PSMC proliferation stimulated with CM of control or PFKFB3/*Pfkfb3* knockdown or deficient human or mouse PAECs exposed to hypoxia (1% O<sub>2</sub>) or normoxia. (D) Western blot analysis and densitometric quantification of PFKFB3 protein levels in human PAECs transfected with Ad-shCTRL or Ad-shPFKFB3. n = 5. (E) Representative images of EdU staining and (F) quantification of EdU staining and WST-1 assay in human PSMCs exposed to conditioned medium of Ad-shCTRL or Ad-shPFKFB3 transfected PAECs exposed to hypoxia for 24 hours. Cells were costained for EdU (red) and DAPI (blue). Scale bar, 100  $\mu$ m. (G) Representative images of EdU staining and quantification of EdU staining and WST-1 assay in human PSMCs exposed to conditioned medium from PAECs of normal controls

with IPAH. Cells were costained for EdU (*red*) and DAPI (*blue*). Scale bar, 100  $\mu$ m. Cells were costained for EdU (*red*) and DAPI (*blue*). Scale bar, 100  $\mu$ m. (H) Representative images of EdU staining and quantification of EdU staining and WST-1 assay in human PASMCs exposed to conditioned medium from Ad-shCTRL or Ad-shPFKFB3 transfected PAECs of patients with IPAH. (I) Quantification of EdU staining and WST-1 assay in mouse PASMCs exposed to conditioned medium of *Pfkfb3*<sup>WT</sup> and *Pfkfb3*<sup>ΔVEC</sup> PAECs. All data are expressed as mean  $\pm$  SEM. Statistical significance was determined by one-way ANOVA followed by Bonferroni test (for A-B, F and I) and unpaired Student's *t* test (for D and G-H). \*  $p < 0.05$  was considered significant, \*\*  $p < 0.01$ , \*\*\*  $p < 0.001$ . ns, no significance.

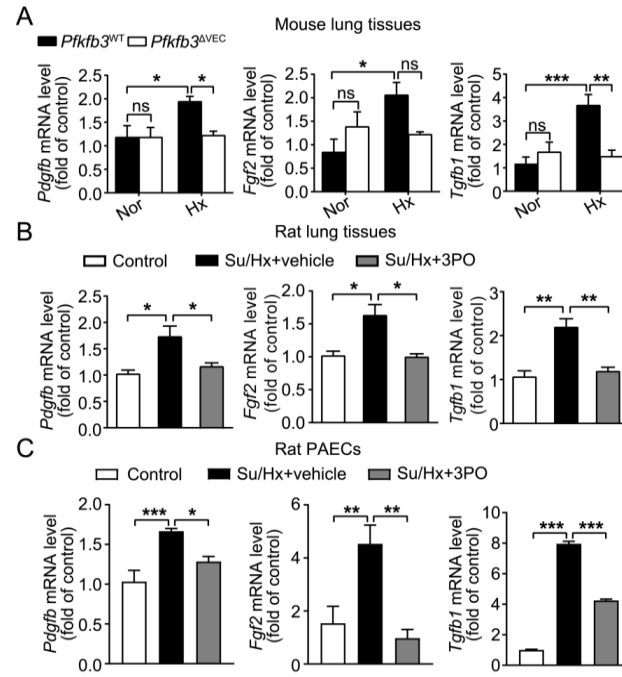

**Figure S7. *Pfkfb3* deficiency/inhibition decreases gene expression of growth factors in lungs of mice and rats with PH.** (A) Real time-PCR analysis of mRNA levels of *Pdgfb*, *Fgf2* and *Tgfb1* in lung homogenates of *Pfkfb3*<sup>ΔVEC</sup> and *Pfkfb3*<sup>WT</sup> mice exposed to normoxia or hypoxia (10% O<sub>2</sub>) for 4 weeks. n = 6. (B) Real time-PCR analysis of mRNA levels of *Pdgfb*, *Fgf2* and *Tgfb1* in lung homogenates of control and vehicle- or 3PO-treated Su/Hx rats. n = 6. (C) Real time-PCR analysis of mRNA levels of *Pdgfb*, *Fgf2* and *Tgfb1* in PAECs isolated from control and treated rats (Su/Hx + vehicle and Su/Hx + 3PO). n = 5. All data are expressed as mean ± SEM. Statistical significance was determined by one-way ANOVA followed by Bonferroni test. \* *p* < 0.05 was considered significant, \*\* *p* < 0.01, \*\*\* *p* < 0.001. ns, no significance. Nor, normoxia. Hx, hypoxia.

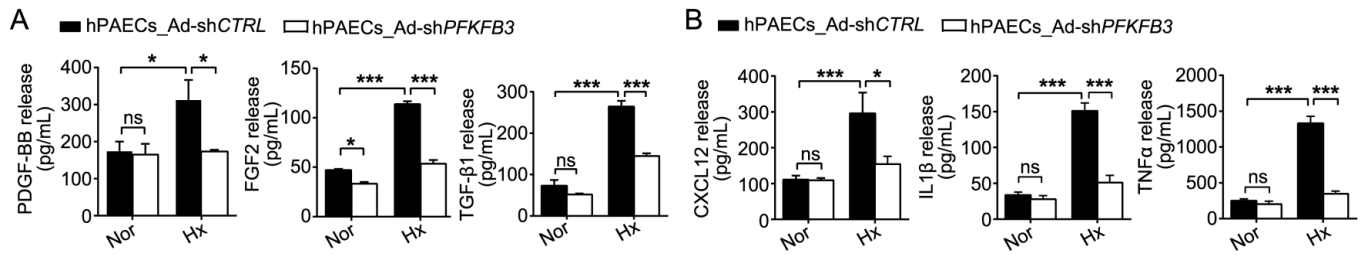

**Figure S8. *PFKFB3* knockdown decreases the hypoxia-induced growth factor and inflammatory cytokine release from hPAECs.** (A) Levels of released PDGF-BB, FGF2 and TGF- $\beta$ 1 in the culture supernatants of human PAECs transfected with Ad-shCTRL and Ad-sh*PFKFB3* and exposed to normoxia or hypoxia (1% O<sub>2</sub>) for 24 hours. n = 4-6. (B) Levels of released CXCL12, IL1 $\beta$  and TNF $\alpha$  in the culture supernatants of human PAECs transfected with Ad-shCTRL and Ad-sh*PFKFB3* and exposed to normoxia or hypoxia (1% O<sub>2</sub>) for 24 hours. n = 4-6. All data are expressed as mean  $\pm$  SEM. Statistical significance was determined by one-way ANOVA followed by Bonferroni test. \*  $p < 0.05$  was considered significant, \*\*  $p < 0.01$ , \*\*\*  $p < 0.001$ . ns, no significance. Nor, normoxia. Hx, hypoxia.

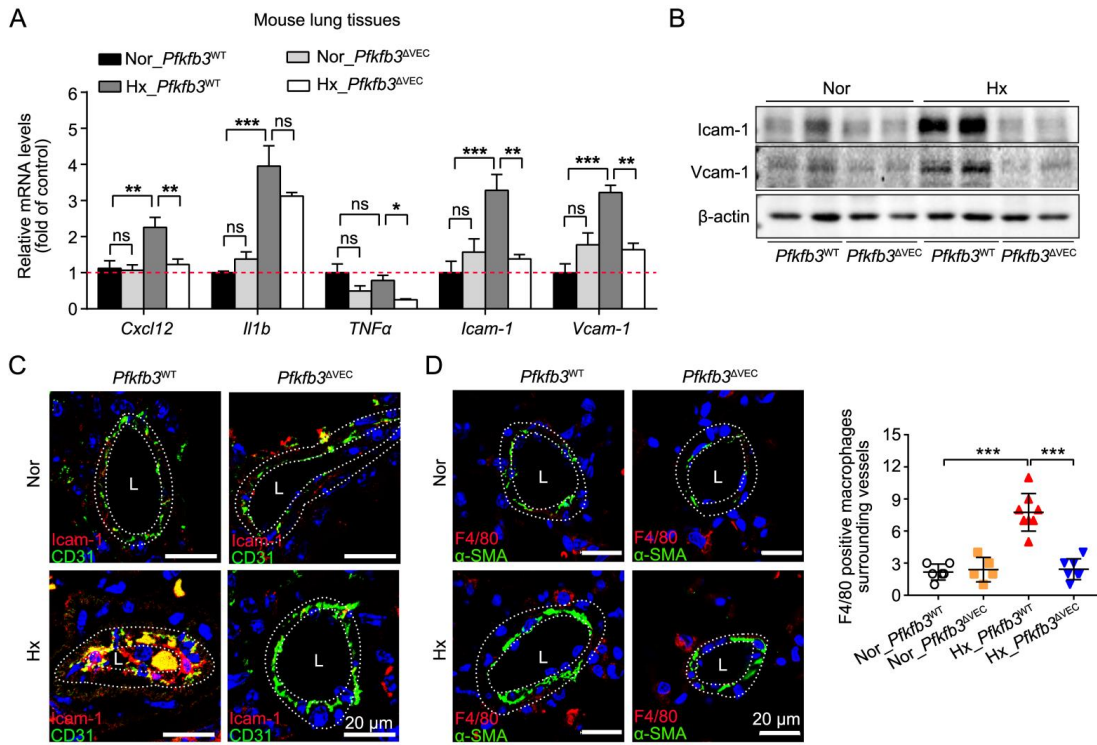

**Figure S9. Endothelial *Pfkfb3* deficiency decreases the hypoxia-induced inflammation in mouse lungs.** (A) Real time-PCR analysis of mRNA levels of *Cxcl12*, *Il1b*, *TNFα*, *Icam-1* and *Vcam-1* in lung homogenates of *Pfkfb3*<sup>WT</sup> and *Pfkfb3*<sup>ΔVEC</sup> mice exposed to normoxia or hypoxia (10% O<sub>2</sub>) for 4 weeks. n = 6. (B) Western blot analysis of Icam-1 and Vcam-1 protein levels of lung homogenates from *Pfkfb3*<sup>WT</sup> and *Pfkfb3*<sup>ΔVEC</sup> mice exposed to normoxia or hypoxia (10% O<sub>2</sub>) for 4 weeks. (C) Representative micrographs of *Pfkfb3*<sup>WT</sup> and *Pfkfb3*<sup>ΔVEC</sup> mouse pulmonary vessels stained for Icam-1 (red), or CD31 (green), and counterstained with DAPI (blue). L, lumen. Scale bar, 20 μm. (D) Representative immunostaining (left) showing macrophages around pulmonary arteries in *Pfkfb3*<sup>WT</sup> and *Pfkfb3*<sup>ΔVEC</sup> mice exposed to normoxia or hypoxia (10% O<sub>2</sub>) for 4 weeks. Sections were costained for F4/80 (red), or α-SMA (green) and counterstained with DAPI (blue). (right) Quantification of the infiltrated F4/80-positive macrophages around pulmonary arteries. n = 5-7. L, lumen. Scale bar, 20 μm. All data are expressed as mean ± SEM. Statistical significance was determined by one-way ANOVA followed by Bonferroni test. \* *p* < 0.05 was considered significant, \*\* *p* < 0.01, \*\*\* *p* < 0.001. ns, no significance. Nor, normoxia. Hx, hypoxia.

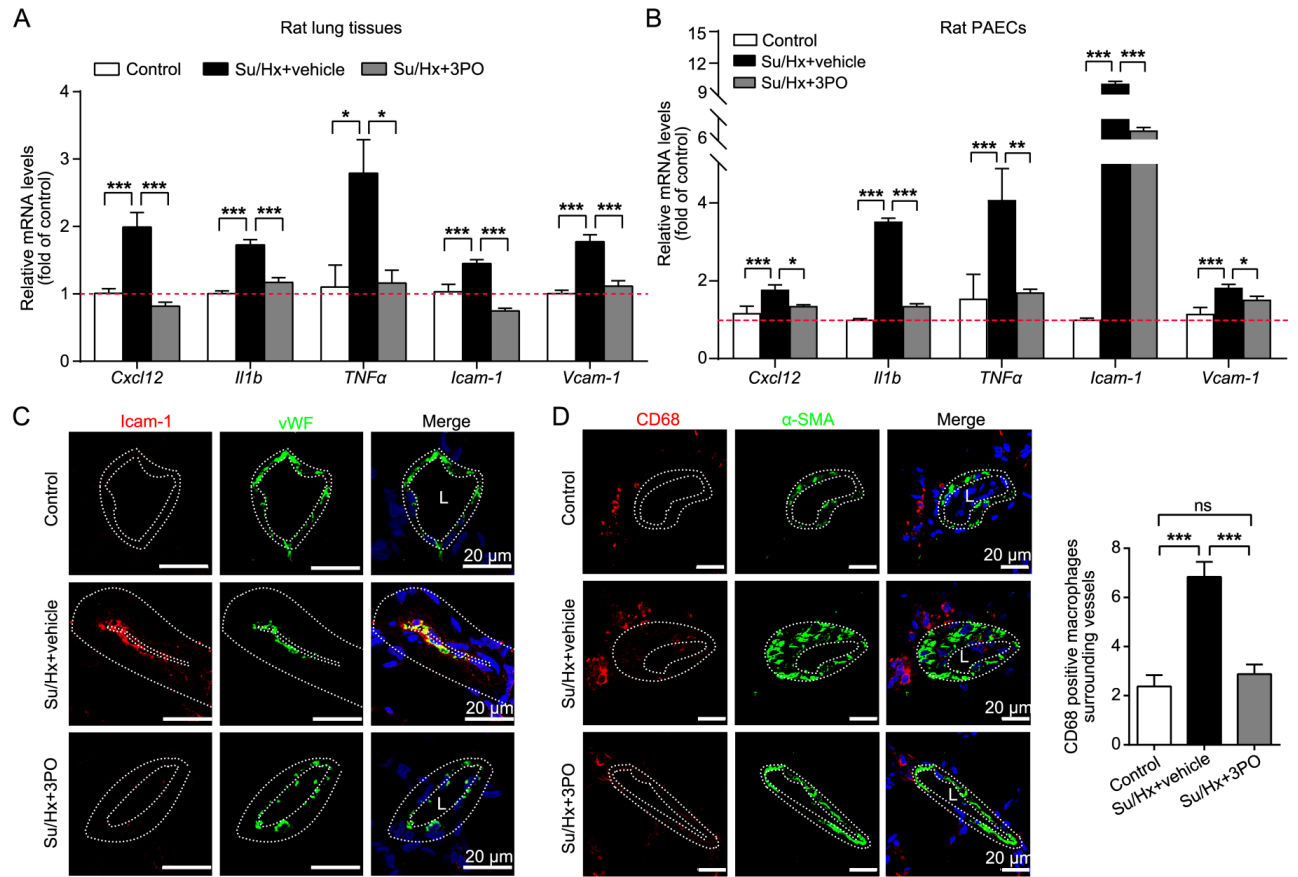

**Figure S10. Pfkfb3 inhibition reduces lung inflammation in Su/Hx rats.** (A) Real time-PCR analysis of mRNA levels of *Cxcl12*, *Il1b*, *TNFa*, *Icam-1* and *Vcam-1* in lung homogenates of vehicle or 3PO-treated Su/Hx rats.  $n = 6$ . (B) Real time-PCR analysis of mRNA levels of *Cxcl12*, *Il1b*, *TNFa*, *Icam-1* and *Vcam-1* in PAECs isolated from control rats and treated rats (Su/Hx + vehicle and Su/Hx + 3PO).  $n = 6$ . (C) Representative micrographs of pulmonary vessels stained for Icam-1 (red), vWF (green), and DAPI (blue). Sections were from vehicle and 3PO-treated Su/Hx rats. L, lumen. Scale bar, 20  $\mu$ m. (D) (left) Representative immunostaining showing macrophages around pulmonary arteries in vehicle and 3PO-treated Su/Hx rats. Lung sections were co-stained with CD68 (red),  $\alpha$ -SMA (green) and DAPI (blue). (right) Quantification of the infiltrated CD68-positive macrophages around pulmonary arteries.  $n = 6$ . L, lumen. Scale bar, 20  $\mu$ m. All data are expressed as mean  $\pm$  SEM. Statistical significance was determined by one-way ANOVA followed by Bonferroni test. \*  $p < 0.05$  was considered significant, \*\*  $p < 0.01$ , \*\*\*  $p < 0.001$ . ns, no significance.

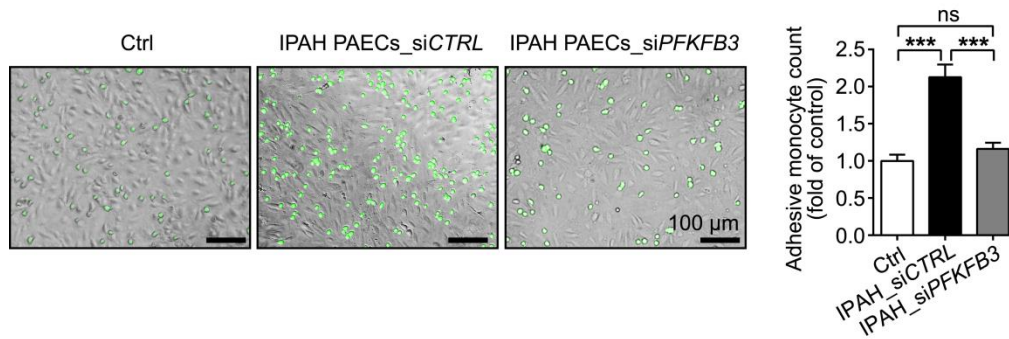

**Figure S11. *PFKFB3* KD in PAECs reduces monocyte adhesion to PAECs.** (*left*) Representative images and (*right*) quantification of monocyte adhesion to normal or siCTRL and si*PFKFB3* transfected PAECs of patients with IPAH.  $n = 4$ . All data are expressed as mean  $\pm$  SEM. Statistical significance was determined by one-way ANOVA followed by Bonferroni test. \*  $p < 0.05$  was considered significant, \*\*  $p < 0.01$ , \*\*\*  $p < 0.001$ . ns, no significance.

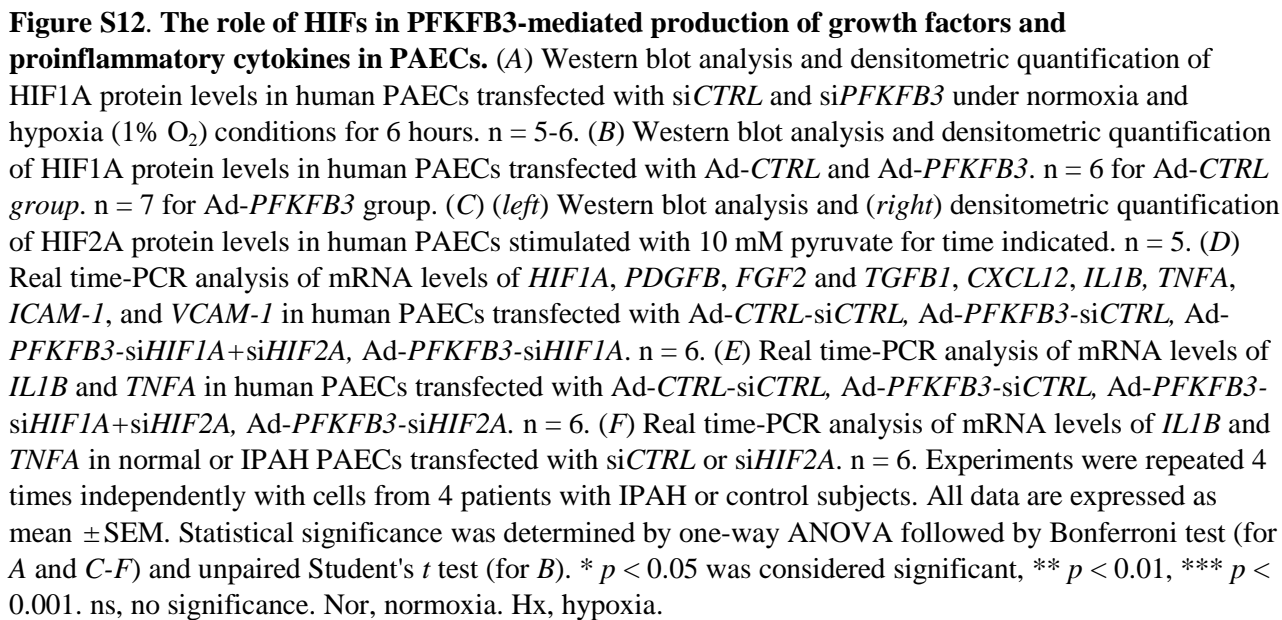

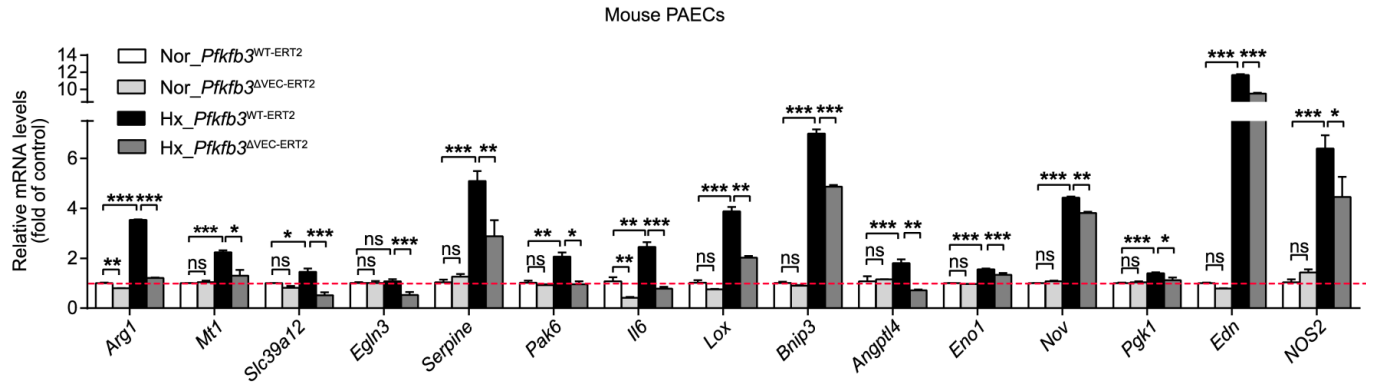

**Figure S13. *Pfkfb3* deficiency decreases expression of Hif2a-targeted genes in mouse PAECs.** Real time-PCR analysis of mRNA levels of Hif2a-targeted genes in PAECs of *Pfkfb3*<sup>WT-ERT2</sup> and *Pfkfb3*<sup>ΔVEC-ERT2</sup> mice exposed to normoxia or hypoxia (10% O<sub>2</sub>) for 6 weeks. n = 6. All data are expressed as mean ± SEM. Statistical significance was determined by one-way ANOVA followed by Bonferroni test. \*  $p < 0.05$  was considered significant, \*\*  $p < 0.01$ , \*\*\*  $p < 0.001$ . ns, no significance. Nor, normoxia. Hx, hypoxia.

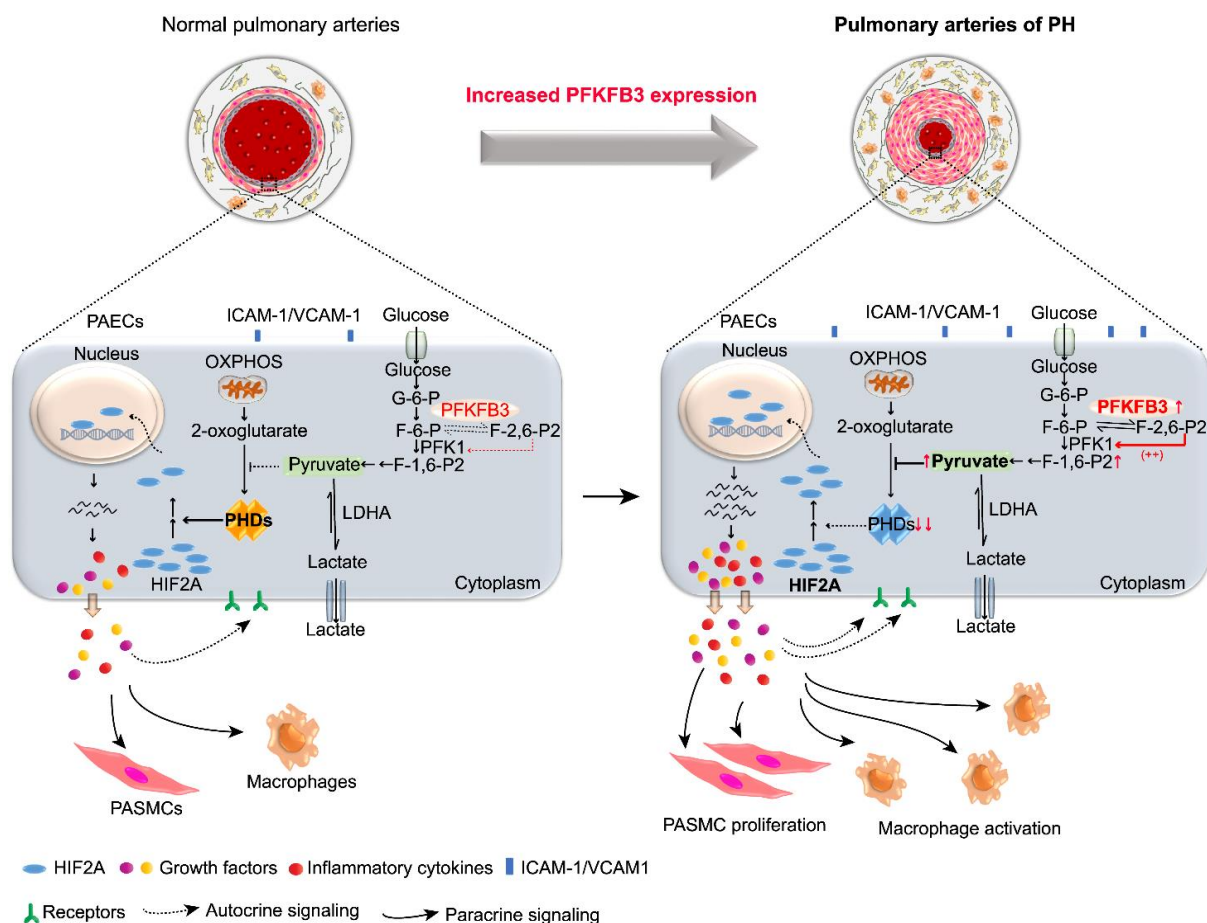

**Figure S14. Schematic diagram indicates how endothelial-PFKFB3-mediated glycolysis affects the development and progression of PH.** Enhanced expression and activity of endothelial PFKFB3 increase production of glycolytic metabolites including pyruvate. Prolyl hydroxylase domains (PHDs) are members of the 2-oxoglutarate-dependent family of dioxygenases, which require oxygen, ferrous iron, and 2-oxoglutarate as the substrates for catalytic activity. As pyruvate is structurally similar to 2-oxoglutarate, pyruvate can competitively bind to the 2-oxoglutarate site of PHDs, leading to decreased PHD activity and subsequent suppressed hydroxylation and degradation of HIF2A. An increased level of HIF2A enhances expression of many growth factors, proinflammatory cytokines, and adhesion molecules in endothelial cells. All these factors contribute to the development and progression of PH. G-6-P, glucose-6-phosphate. F-6-P, fructose-6-phosphate. PFK-1, phosphofructokinase 1. F-1,6-P2, fructose-1,6-bisphosphate. F-2,6-P2, fructose-2,6-bisphosphate. LDHA, lactate dehydrogenase A. OXPHOS, oxidative phosphorylation.
